# Supplementary figures and images for: A synergy-based hand control is encoded in human motor cortical areas
Source: eLife journal article supplement (doi:10.7554/elife.13420), 2016-02-15

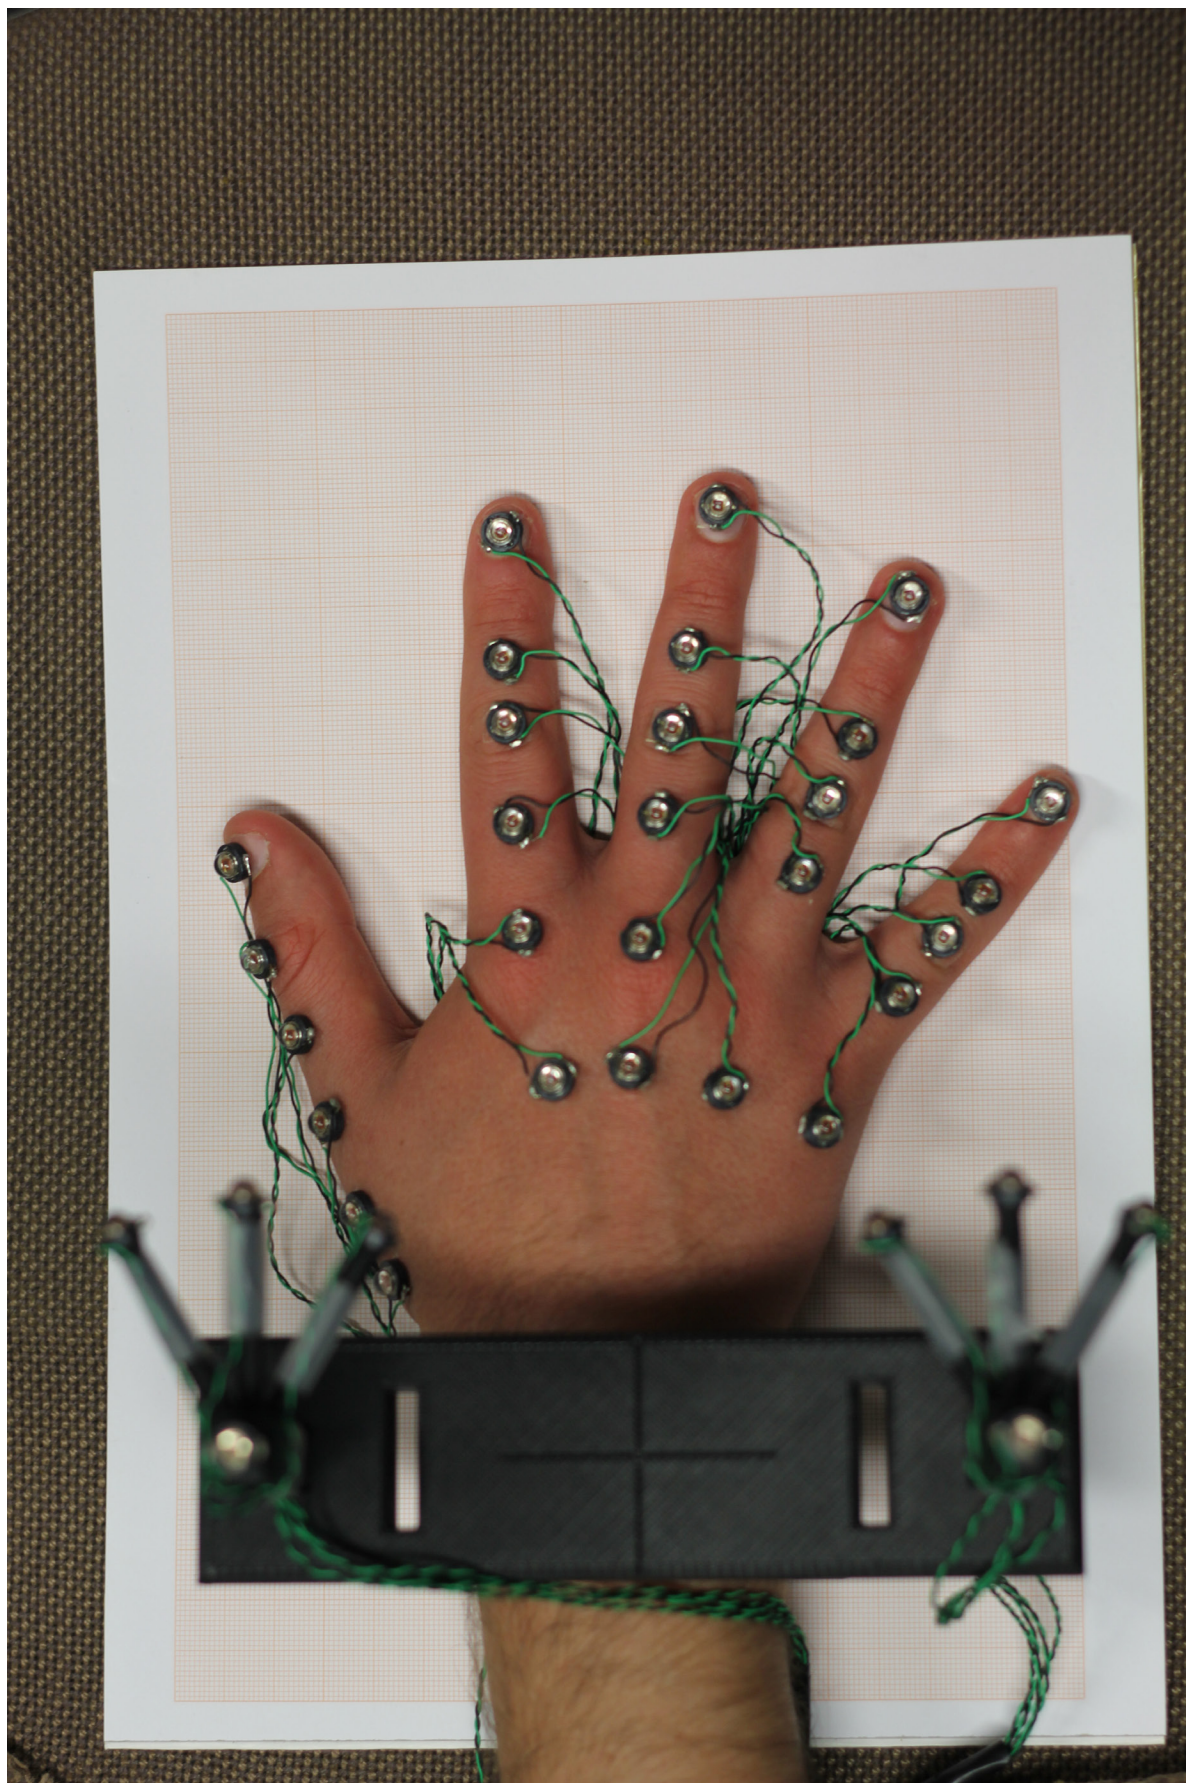

Supplement: supp [file elife-13420-supp-v1.zip]

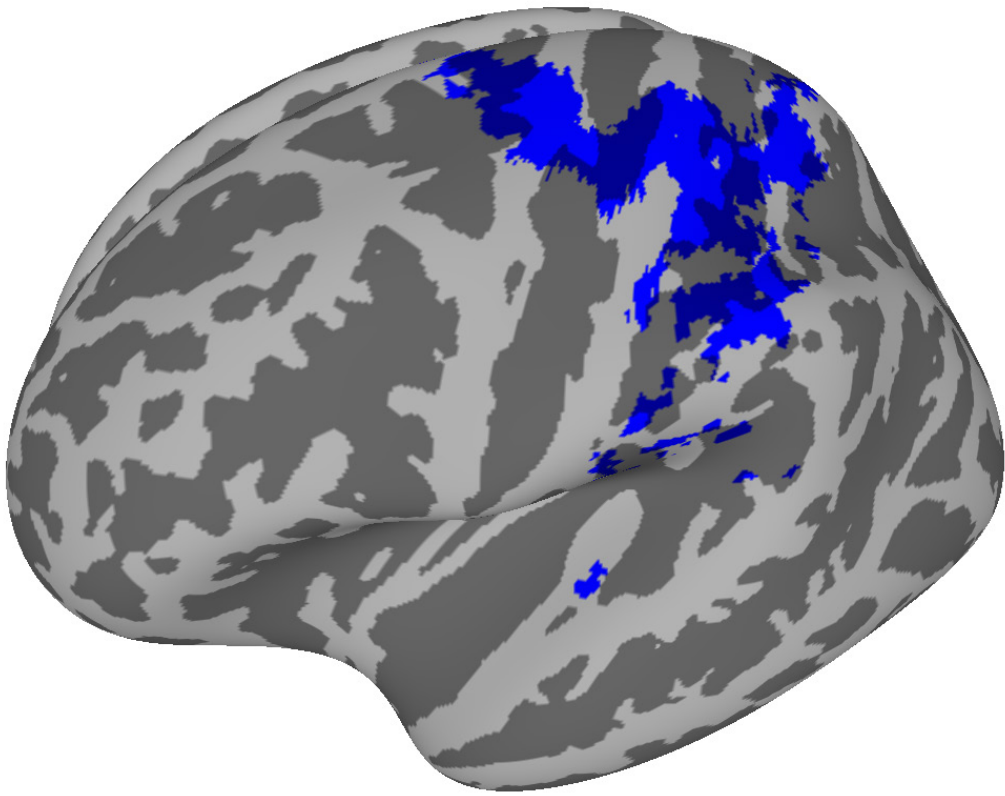

Supplement: supp [file elife-13420-supp-v1.zip]

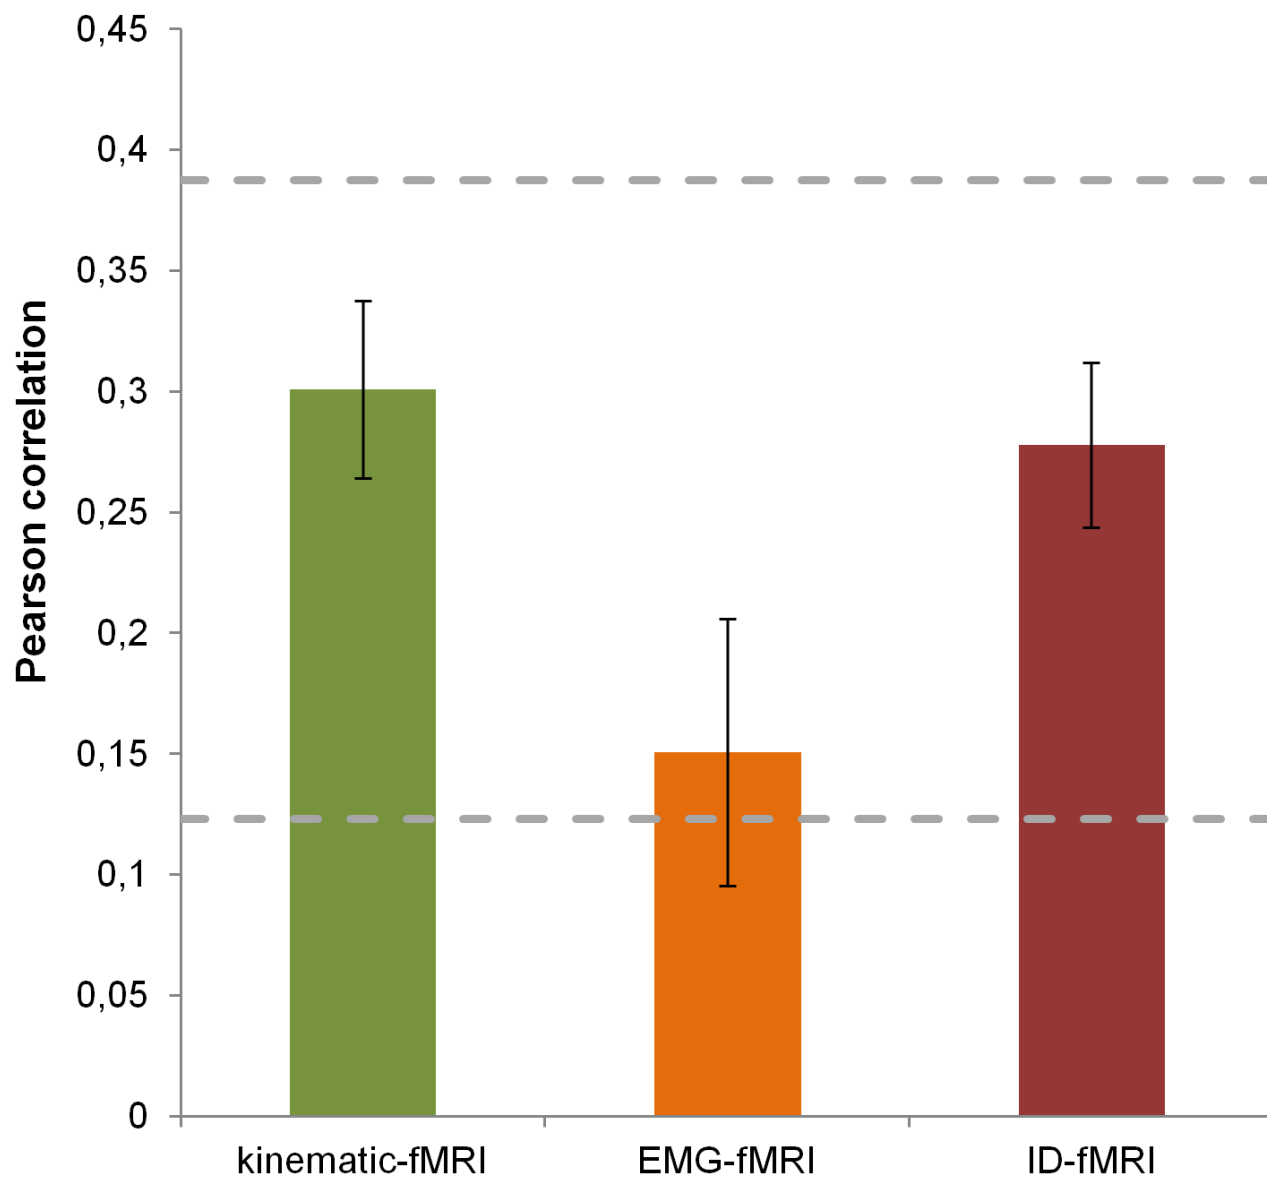

Supplement: supp [file elife-13420-supp-v1.zip]

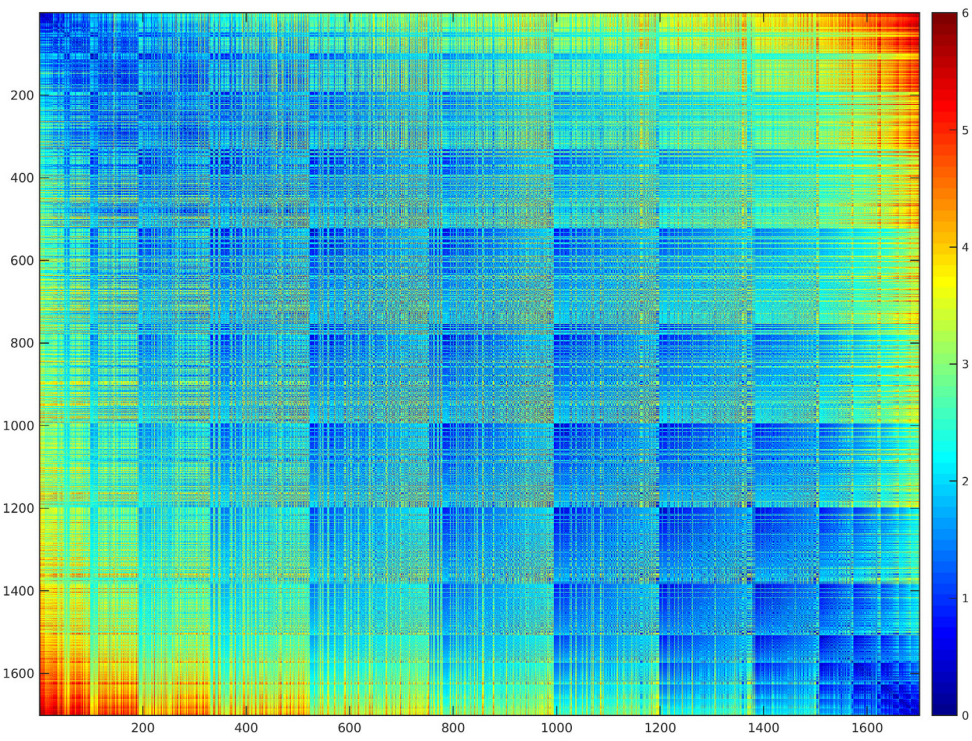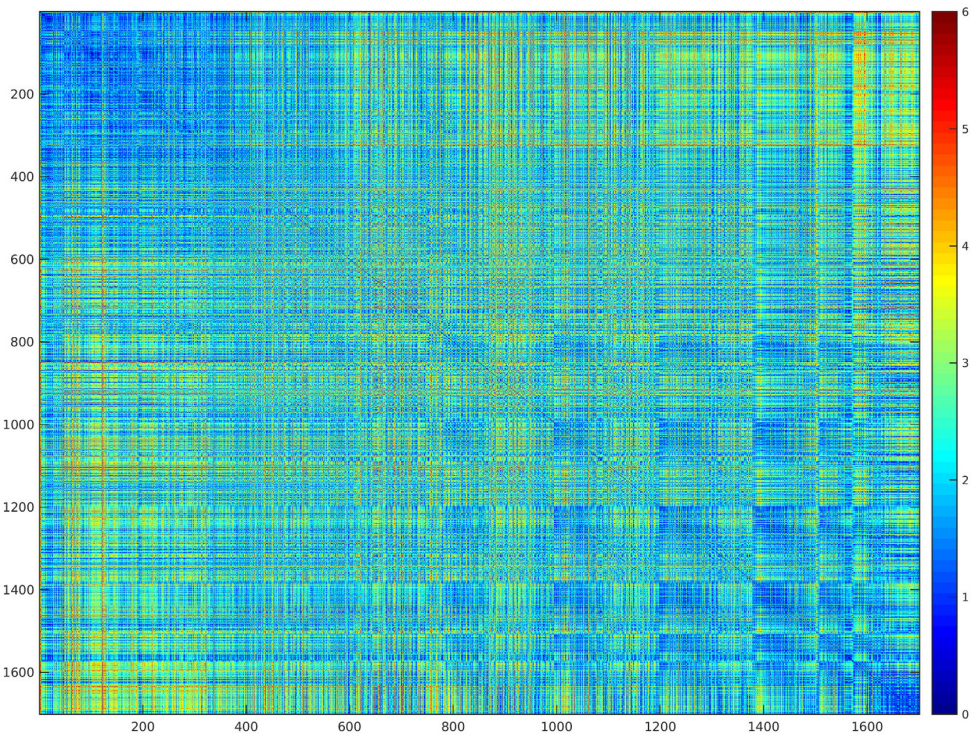

Supplement: supp [file elife-13420-supp-v1.zip]

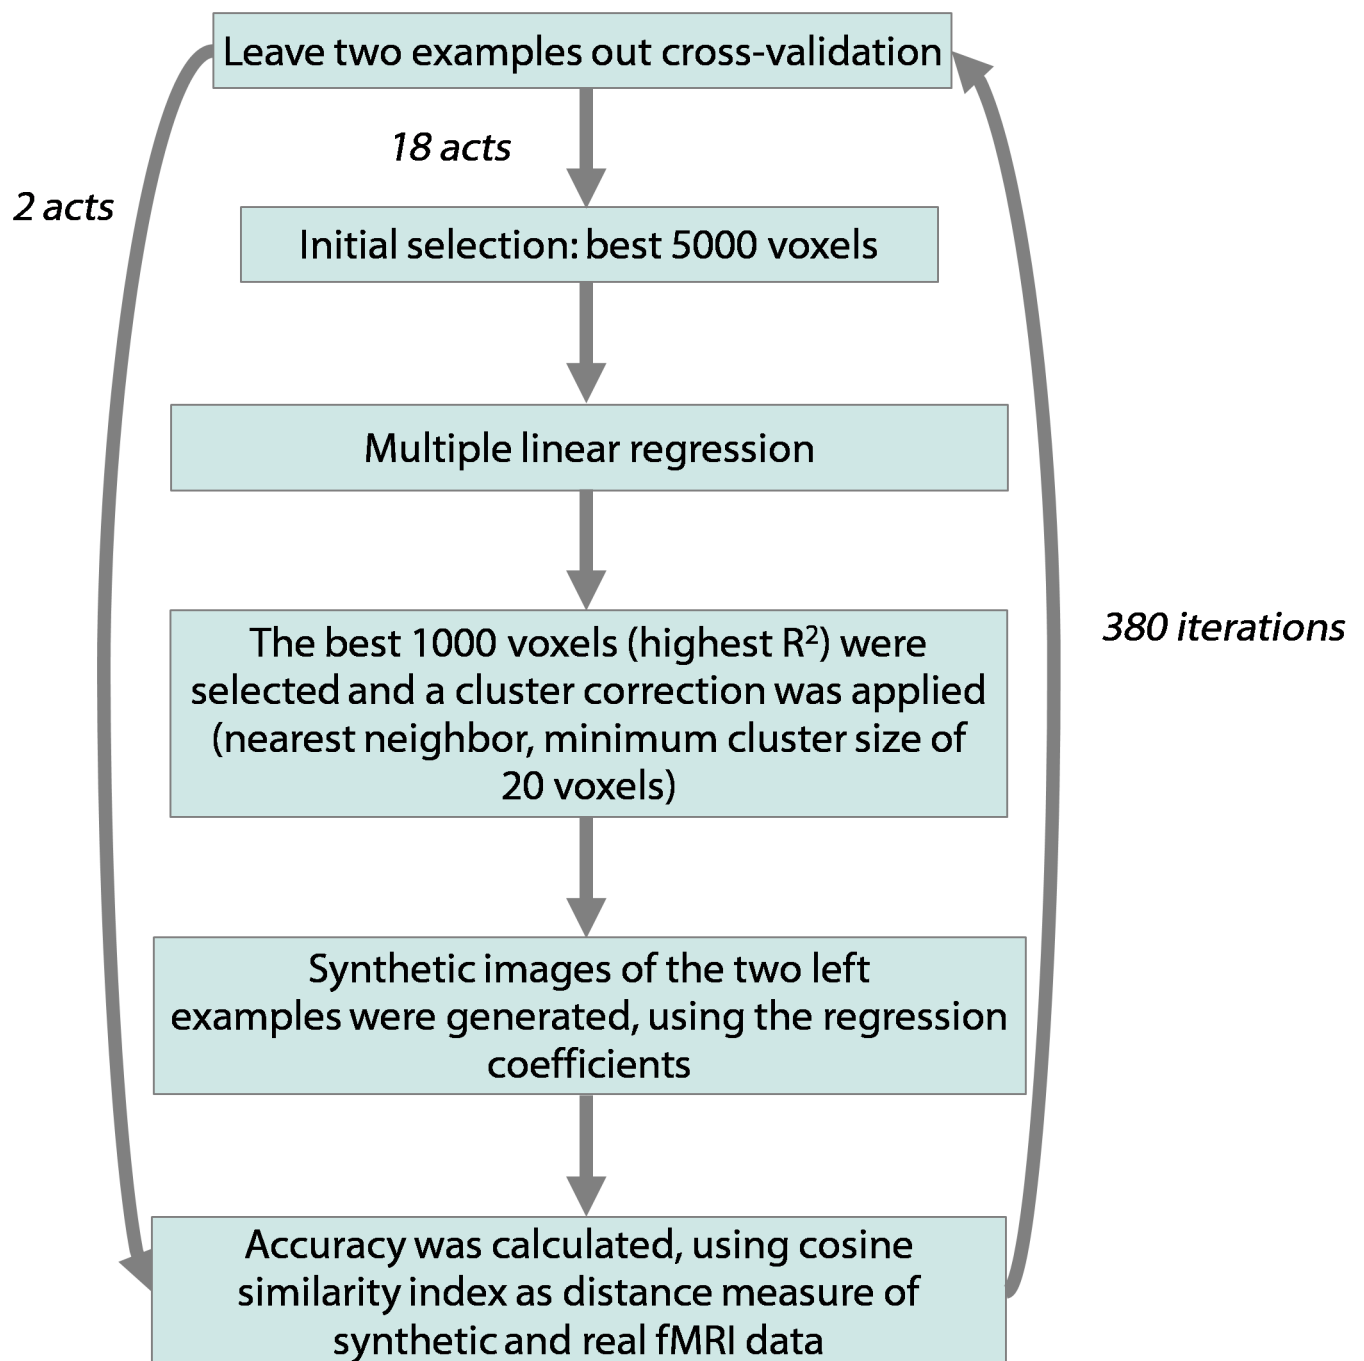

Supplement: supp [file elife-13420-supp-v1.zip]
